# Supplementary material for: Genetic Diversity of Seven Cattle Breeds Inferred Using Copy Number Variations
Source: Front Genet. 2018 May 15;9:163. doi: 10.3389/fgene.2018.00163 (PMC5962699; doi:10.3389/fgene.2018.00163)
Supplement: Additional File 3 — Significant pairwise association Chi2 and P-values of deletion and duplication (CN_A and CN_B) CNVR events (CNVR_LocA and CNVR_LocB) identified in all seven cattle breeds. [file Table_3.XLSX]

## Sheet: Sheet1
CNVR_LocB	CN_B	CNVR_LocA	CN_A	Chi2	Df	P-Value
chr14:1514056-2553525	DEL	chr11:102861577-107043330	DEL	27.2527	8	0.0006
chr18:62375495-63727709	DEL	chr11:102861577-107043330	DEL	28.2878	6	0.0001
chr18:62375495-63727709	DUP	chr11:102861577-107043330	DUP	22.1631	8	0.0046
chr20:70669729-71652724	DUP	chr11:102861577-107043330	DUP	18.377	8	0.0186
chr21:70089833-71136925	DEL	chr11:102861577-107043330	DEL	20.5967	8	0.0083
chr22:58873440-61283415	DEL	chr11:102861577-107043330	DEL	28.3064	8	0.0004
chr22:58873440-61283415	DUP	chr11:102861577-107043330	DUP	28.1635	10	0.0017
chr25:40940951-42768470	DEL	chr11:102861577-107043330	DEL	32.561	8	0.0001
chr25:40940951-42768470	DUP	chr11:102861577-107043330	DUP	32.186	8	0.0001
chr26:25880226-25982293	DEL	chr11:102861577-107043330	DEL	13.9901	6	0.0297
chr26:50817833-51680135	DEL	chr11:102861577-107043330	DEL	26.9878	8	0.0007
chr29:48948337-51502868	DEL	chr11:102861577-107043330	DEL	27.6979	8	0.0005
chr3:120122176-121403393	DEL	chr11:102861577-107043330	DEL	27.21	8	0.0007
chr18:62375495-63727709	DEL	chr14:1514056-2553525	DEL	22.9879	6	0.0008
chr26:50817833-51680135	DEL	chr14:1514056-2553525	DEL	32.4238	8	0.0001
chr3:120122176-121403393	DEL	chr14:1514056-2553525	DEL	32.4661	8	0.0001
chr11:102861577-107043330	DEL	chr17:73118011-74998349	DEL	39.423	8	0
chr11:102861577-107043330	DUP	chr17:73118011-74998349	DUP	43.3063	10	0
chr14:1514056-2553525	DEL	chr17:73118011-74998349	DEL	33.9269	10	0.0002
chr18:62375495-63727709	DEL	chr17:73118011-74998349	DEL	28.9423	6	0.0001
chr18:62375495-63727709	DUP	chr17:73118011-74998349	DUP	30.3805	8	0.0002
chr21:70089833-71136925	DEL	chr17:73118011-74998349	DEL	20.6759	8	0.0081
chr22:58873440-61283415	DEL	chr17:73118011-74998349	DEL	37.5537	8	0
chr22:58873440-61283415	DUP	chr17:73118011-74998349	DUP	28.559	10	0.0015
chr25:40940951-42768470	DEL	chr17:73118011-74998349	DEL	48.3483	10	0
chr25:40940951-42768470	DUP	chr17:73118011-74998349	DUP	27.2361	8	0.0006
chr26:25880226-25982293	DEL	chr17:73118011-74998349	DEL	20.184	6	0.0026
chr26:50817833-51680135	DEL	chr17:73118011-74998349	DEL	27.1066	8	0.0007
chr29:48948337-51502868	DEL	chr17:73118011-74998349	DEL	40.485	10	0
chr29:48948337-51502868	DUP	chr17:73118011-74998349	DUP	16.7919	8	0.0324
chr3:120122176-121403393	DEL	chr17:73118011-74998349	DEL	27.0481	8	0.0007
chr3:120122176-121403393	DUP	chr17:73118011-74998349	DUP	17.293	8	0.0272
chr20:70669729-71652724	DUP	chr18:62375495-63727709	DUP	16.4884	6	0.0114
chr26:25880226-25982293	DEL	chr18:62375495-63727709	DEL	13.829	6	0.0316
chr26:50817833-51680135	DEL	chr18:62375495-63727709	DEL	23.0606	6	0.0008
chr3:120122176-121403393	DEL	chr18:62375495-63727709	DEL	23.123	6	0.0008
chr14:1514056-2553525	DEL	chr21:70089833-71136925	DEL	24.268	8	0.0021
chr18:62375495-63727709	DEL	chr21:70089833-71136925	DEL	15.2903	6	0.0181
chr26:50817833-51680135	DEL	chr21:70089833-71136925	DEL	24.3825	8	0.002
chr29:48948337-51502868	DEL	chr21:70089833-71136925	DEL	23.0615	8	0.0033
chr3:120122176-121403393	DEL	chr21:70089833-71136925	DEL	24.3746	8	0.002
chr14:1514056-2553525	DEL	chr22:58873440-61283415	DEL	24.9631	8	0.0016
chr18:62375495-63727709	DEL	chr22:58873440-61283415	DEL	23.6167	6	0.0006
chr21:70089833-71136925	DEL	chr22:58873440-61283415	DEL	18.5698	8	0.0173
chr25:40940951-42768470	DEL	chr22:58873440-61283415	DEL	38.3375	8	0
chr26:25880226-25982293	DEL	chr22:58873440-61283415	DEL	16.7661	6	0.0102
chr26:50817833-51680135	DEL	chr22:58873440-61283415	DEL	24.877	8	0.0016
chr29:48948337-51502868	DEL	chr22:58873440-61283415	DEL	23.3444	8	0.0029
chr29:48948337-51502868	DUP	chr22:58873440-61283415	DUP	17.7409	8	0.0233
chr3:120122176-121403393	DEL	chr22:58873440-61283415	DEL	24.8789	8	0.0016
chr14:1514056-2553525	DEL	chr25:40940951-42768470	DEL	35.1045	10	0.0001
chr18:62375495-63727709	DEL	chr25:40940951-42768470	DEL	27.7483	6	0.0001
chr21:70089833-71136925	DEL	chr25:40940951-42768470	DEL	22.1765	8	0.0046
chr22:58873440-61283415	DUP	chr25:40940951-42768470	DUP	23.1954	8	0.0031
chr26:25880226-25982293	DEL	chr25:40940951-42768470	DEL	20.2225	6	0.0025
chr26:50817833-51680135	DEL	chr25:40940951-42768470	DEL	28.4356	8	0.0004
chr29:48948337-51502868	DEL	chr25:40940951-42768470	DEL	33.6586	10	0.0002
chr3:120122176-121403393	DEL	chr25:40940951-42768470	DEL	28.4082	8	0.0004
chr3:120122176-121403393	DEL	chr26:50817833-51680135	DEL	31.9913	8	0.0001
chr14:1514056-2553525	DEL	chr29:48948337-51502868	DEL	29.5806	10	0.001
chr18:62375495-63727709	DEL	chr29:48948337-51502868	DEL	15.3472	6	0.0177
chr26:25880226-25982293	DEL	chr29:48948337-51502868	DEL	16.0625	6	0.0134
chr26:50817833-51680135	DEL	chr29:48948337-51502868	DEL	22.7164	8	0.0037
chr3:120122176-121403393	DEL	chr29:48948337-51502868	DEL	22.8419	8	0.0036
chr6:53514737-53719693	DEL	chr29:48948337-51502868	DUP	19.2848	6	0.0037
chr11:102861577-107043330	DUP	chr6:107678393-109951981	DUP	34.1401	10	0.0002
chr11:102861577-107043330	DEL	chr6:107678393-109951981	DEL	24.1678	8	0.0021
chr14:1514056-2553525	DEL	chr6:107678393-109951981	DEL	35.9174	10	0.0001
chr17:73118011-74998349	DEL	chr6:107678393-109951981	DEL	30.8271	10	0.0006
chr18:62375495-63727709	DEL	chr6:107678393-109951981	DEL	20.1898	6	0.0026
chr18:62375495-63727709	DUP	chr6:107678393-109951981	DUP	15.7646	8	0.0459
chr21:70089833-71136925	DEL	chr6:107678393-109951981	DEL	22.9391	8	0.0034
chr22:58873440-61283415	DUP	chr6:107678393-109951981	DUP	29.5212	10	0.001
chr22:58873440-61283415	DEL	chr6:107678393-109951981	DEL	22.0859	8	0.0048
chr25:40940951-42768470	DEL	chr6:107678393-109951981	DEL	32.5181	10	0.0003
chr25:40940951-42768470	DUP	chr6:107678393-109951981	DUP	24.9115	8	0.0016
chr26:50817833-51680135	DEL	chr6:107678393-109951981	DEL	29.1246	8	0.0003
chr29:48948337-51502868	DEL	chr6:107678393-109951981	DEL	28.1857	10	0.0017
chr3:120122176-121403393	DEL	chr6:107678393-109951981	DEL	29.446	8	0.0003
chr3:120122176-121403393	DUP	chr6:107678393-109951981	DUP	17.36	8	0.0266
